# Supplementary material for: Optimising prescribing practices in older adults with multimorbidity: a scoping review of guidelines
Source: HighWire-hosted journal article supplement (doi:10.1136/bmjopen-2021-049072), 2021-12-01
Supplement: bmjopen-2021-049072supp002_data_supplement.pdf [file bmjopen-2021-049072supp002_data_supplement.pdf]

*Supplementary File 2: Search terms based on PCC*

|            | Terms                                                                                                                                                                                                                                              |
|------------|----------------------------------------------------------------------------------------------------------------------------------------------------------------------------------------------------------------------------------------------------|
| Population | <ul style="list-style-type: none"><li>aged, elderly, seniors, older adult(s), older patient(s), older people, older person(s)</li></ul>                                                                                                            |
| Concept    | <ul style="list-style-type: none"><li>prescribing, prescription(s), drug prescriptions, medicine(s), inappropriate prescribing, potentially inappropriate medication list</li><li>guideline(s), list(s), checklist(s), tool(s), criteria</li></ul> |
| Context    | <ul style="list-style-type: none"><li>multimorbidity, comorbidity</li></ul>                                                                                                                                                                        |
