# Supplementary material for: Optimising prescribing practices in older adults with multimorbidity: a scoping review of guidelines
Source: HighWire-hosted journal article supplement (doi:10.1136/bmjopen-2021-049072), 2021-12-01
Supplement: bmjopen-2021-049072supp003_data_supplement.pdf [file bmjopen-2021-049072supp003_data_supplement.pdf]

*Supplementary File 3: Searches in grey literature and key journals*

A search for grey literature was carried out in December 2018 with the following resources: World Health Organisation (<http://www.who.int>), Google Scholar (<https://scholar.google.com/>), Google (<https://www.google.com.sg/>), Ministry of Health, Singapore (<https://www.moh.gov.sg/>), SG Press Centre (<https://www.gov.sg/resources/sgpc>), DR-NTU (Open Access) (<https://dr.ntu.edu.sg/>), ScholarBank@NUS (<https://scholarbank.nus.edu.sg/>), using keywords such as 'prescribing guidelines' and 'multimorbidity'.

Electronic-searching of selected key e-journals were also carried out for the following titles: Journal of the American Geriatrics Society, Age and Ageing, The Journals of Gerontology Series A, Archives of Gerontology and Geriatrics, BMC Geriatrics, and European Geriatric Medicine using keywords 'guidelines', 'prescribing guidelines' and 'multimorbidity'.

A search update was then performed in September 2019 for the same set of resources, with the following included in addition to the above-mentioned resources: US Preventive Services Task Force (USPSTF) (<https://www.uspreventiveservicestaskforce.org/>) and GuidelineCentral (<https://www.guidelinecentral.com/>), Clinical Practice Guidelines Archive (<https://www.ahrq.gov/prevention/guidelines/archive.html>), Emergency Care Research Institute (<https://www.ecri.org/about/>) and Institute for Healthcare Improvement (<http://www.ihl.org/>). Keywords such as 'prescribing guidelines' and 'multimorbidity' were used in the search update as well. Electronic-searching of selected key e-journals were also carried out for the above-mentioned titles using keywords 'guidelines', 'prescribing guidelines' and 'multimorbidity'.
