# Supplementary material for: Optimising prescribing practices in older adults with multimorbidity: a scoping review of guidelines
Source: HighWire-hosted journal article supplement (doi:10.1136/bmjopen-2021-049072), 2021-12-01
Supplement: bmjopen-2021-049072supp005_data_supplement.pdf [file bmjopen-2021-049072supp005_data_supplement.pdf]

*Supplementary file 5: List of studies by guideline types*

| <b>Author, Year</b>                            | <b>Title</b>                                                                                                                                                                                |
|------------------------------------------------|---------------------------------------------------------------------------------------------------------------------------------------------------------------------------------------------|
| <b>1) Implicit Criteria</b>                    |                                                                                                                                                                                             |
| Barnett et al, 2015                            | Patient-centred management of polypharmacy: a process for practice                                                                                                                          |
| Boyd et al, 2019                               | Decision Making for Older Adults With Multiple Chronic Conditions: Executive Summary for the American Geriatrics Society Guiding Principles on the Care of Older Adults With Multimorbidity |
| Burt et al, 2018                               | Developing a measure of polypharmacy appropriateness in primary care: systematic review and expert consensus study                                                                          |
| Drenth-van Maanen et al, 2009                  | Prescribing Optimization Method for Improving Prescribing in Elderly Patients Receiving Polypharmacy: Results of Application to Case Histories by General Practitioners                     |
| Durso, 2007                                    | Prioritizing care for older adults with multiple comorbidities: Working in the 'zone of complexity'                                                                                         |
| Garfinkel et al, 2015                          | Routine deprescribing of chronic medications to combat polypharmacy                                                                                                                         |
| Hilmer et al, 2012                             | Thinking through the medication list - appropriate prescribing and deprescribing in robust and frail older patients                                                                         |
| American Geriatrics Society, 2012 <sup>1</sup> | Patient-Centered Care for Older Adults with Multiple Chronic Conditions: A Stepwise Approach from the American Geriatrics Society                                                           |
| American Geriatrics Society, 2012 <sup>1</sup> | Guiding Principles for the Care of Older Adults with Multimorbidity: An Approach for Clinicians                                                                                             |
| Muth et al, 2014                               | The Ariadne principles: how to handle multimorbidity in primary care consultation                                                                                                           |
| Palmer et al, 2018                             | Multimorbidity care model: Recommendations from the consensus meeting of the Joint Action on Chronic Diseases and Promoting Healthy Ageing across the Life Cycle (JA-CHRODIS)               |
| Scott et al, 2015                              | Reducing Inappropriate Polypharmacy: The Process of Deprescribing                                                                                                                           |
| Sinott et al, 2015                             | What to give the patient who has everything? A qualitative study of prescribing for multimorbidity in primary care                                                                          |
| Todd et al, 2018                               | The deprescribing rainbow: a conceptual framework highlighting the importance of patient context when stopping medication in older people                                                   |
| Wilson et al, 2015                             | Prescribing to fit the needs of older people - the NHS Scotland Polypharmacy Guidance, 2nd edition                                                                                          |
| Best Practice Advocacy Centre                  | Polypharmacy in primary care: Managing a clinical conundrum                                                                                                                                 |

|                             |                                                                                                                                                                                                    |
|-----------------------------|----------------------------------------------------------------------------------------------------------------------------------------------------------------------------------------------------|
| NZ, 2014                    |                                                                                                                                                                                                    |
| Tully et al, 2005           | Development and Face Validity of Explicit indicators of Appropriateness of Long Term Prescribing                                                                                                   |
| Lewis, 2004                 | Using the NO TEARS tool for medication review                                                                                                                                                      |
| Hanlon and Schmader, 2013   | The Medication Appropriateness Index at 20: Where It Started, Where It Has Been, and Where It May Be Going                                                                                         |
| <b>2) Explicit Criteria</b> |                                                                                                                                                                                                    |
| Winit-Watjana et al, 2008   | Criteria for high-risk medication use in Thai older patients                                                                                                                                       |
| Van der Linden et al, 2014  | Development and validation of the RASP list (Rationalization of Home Medication by an Adjusted STOPP list in Older Patients): A novel tool in the management of geriatric polypharmacy             |
| Tommeiein et al, 2015       | Older patients' prescriptions screening in the community pharmacy: development of the Ghent Older People's Prescriptions community Pharmacy Screening (GheOP3S) tool                               |
| Rognstad et al, 2009        | The Norwegian General Practice (NORGE) criteria for assessing potentially inappropriate prescriptions to elderly patients                                                                          |
| Rodriguez-Pérez et al, 2017 | Novel tool for deprescribing in chronic patients with multimorbidity: List of Evidence-Based Deprescribing for Chronic Patients criteria                                                           |
| Renom-Guiteras et al, 2015  | The EU(7)-PIM list: A list of potentially inappropriate medications for older people consented by experts from seven European countries                                                            |
| Mann et al, 2012            | Potentially inappropriate medication in geriatric patients: the Austrian consensus panel list                                                                                                      |
| Maio et al, 2010            | Using explicit criteria to evaluate the quality of prescribing in elderly Italian outpatients: a cohort study: Prescribing in elderly outpatients                                                  |
| Laroche et al, 2007         | Potentially inappropriate medications in the elderly: a French consensus panel list                                                                                                                |
| Kojima et al, 2016          | Screening Tool for Older Persons' Appropriate Prescriptions for Japanese: Report of the Japan Geriatrics Society Working Group on "Guidelines for medical treatment and its safety in the elderly" |
| Kim et al, 2015             | Consensus Validated List of Potentially Inappropriate Medication for the Elderly and Their Prevalence in South Korea                                                                               |
| Kim et al, 2010             | Development of a List of Potentially Inappropriate Drugs for the Korean Elderly Using the Delphi Method                                                                                            |
| Holt et al, 2010            | Potentially Inappropriate Medications in the Elderly                                                                                                                                               |
| Chang et al, 2012           | Using published criteria to develop a list of potentially inappropriate medications for elderly patients in Taiwan                                                                                 |
| Bachyrycz et al, 2012       | Development and Dissemination of a Statewide System to Minimize Use of Potentially Inappropriate                                                                                                   |

|                                                                                       |                                                                                                                                                                                                   |
|---------------------------------------------------------------------------------------|---------------------------------------------------------------------------------------------------------------------------------------------------------------------------------------------------|
|                                                                                       | Medications (PIMs)                                                                                                                                                                                |
| The American Geriatrics Society Beers Criteria Update Expert Panel, 2019 <sup>2</sup> | American Geriatrics Society 2019 Updated AGS Beers Criteria® for Potentially Inappropriate Medication Use in Older Adults                                                                         |
| The American Geriatrics Society Beers Criteria Update Expert Panel, 2015 <sup>2</sup> | American Geriatrics Society 2015 Updated Beers Criteria for Potentially Inappropriate Medication Use in Older Adults                                                                              |
| The American Geriatrics Society Beers Criteria Update Expert Panel, 2012 <sup>2</sup> | American Geriatrics Society Updated Beers Criteria for Potentially Inappropriate Medication Use in Older Adults                                                                                   |
| Fick et al, 2003 <sup>2</sup>                                                         | Updating the Beers Criteria for Potentially Inappropriate Medication Use in Older Adults: Results of a US Consensus Panel of Experts                                                              |
| Wehling, 2015 <sup>3</sup>                                                            | How to Use the FORTA ("Fit fOR The Aged") List to Improve Pharmacotherapy in the Elderly                                                                                                          |
| Wehling et al, 2016 <sup>3</sup>                                                      | VALFORTA: a randomised trial to validate the FORTA (Fit fOR The Aged) classification                                                                                                              |
| Kuhn-Thiel et al, 2014 <sup>3</sup>                                                   | Consensus validation of the FORTA (Fit for the Aged) List: A clinical tool for increasing the appropriateness of pharmacotherapy in the elderly                                                   |
| Pazan et al, 2018                                                                     | The EURO-FORTA (Fit fOR The Aged) List: International Consensus Validation of a Clinical Tool for Improved Drug Treatment in Older People                                                         |
| O'Mahony et al, 2010 <sup>4</sup>                                                     | STOPP & START criteria: A new approach to detecting potentially inappropriate prescribing in old age                                                                                              |
| O'Mahony et al, 2015 <sup>4</sup>                                                     | STOPP/START criteria for potentially inappropriate prescribing in older people: version 2                                                                                                         |
| Hill Taylor et al, 2013 <sup>4</sup>                                                  | Application of the STOPP/START criteria: a systematic review of the prevalence of potentially inappropriate prescribing in older adults, and evidence of clinical, humanistic and economic impact |
| Herefordshire Clinical Commissioning Group, 2016                                      | STOPP START Toolkit Supporting Medication Review                                                                                                                                                  |
| <b>3) Mixed criteria</b>                                                              |                                                                                                                                                                                                   |
| Bergman-Evans & Adams, 2006                                                           | Evidence-based Guideline Improving medication management for older adults clients                                                                                                                 |
| Lavan et al, 2016                                                                     | Methods to reduce prescribing errors in elderly patients with multimorbidity                                                                                                                      |
| Mangin et al, 2018                                                                    | International Group for Reducing Inappropriate Medication Use & Polypharmacy (IGRIMUP): Position                                                                                                  |

|                                                            |                                                                                                                                                                            |
|------------------------------------------------------------|----------------------------------------------------------------------------------------------------------------------------------------------------------------------------|
|                                                            | Statement and 10 Recommendations for Action                                                                                                                                |
| Marengoni, 2015                                            | Best Practices for Drug Prescribing in Older Adults: A Call for Action                                                                                                     |
| NICE, 2016                                                 | Multimorbidity: clinical assessment and management                                                                                                                         |
| All Wales Medicines Strategy Group, 2014                   | Polypharmacy: Guidance for Prescribing                                                                                                                                     |
| Sarkar, 2017                                               | Geriatric Poly-Pharmacy: A Growing Epidemic. How to Prevent It?                                                                                                            |
| Scottish Government Polypharmacy Model of Care Group, 2018 | Polypharmacy Guidance: Realistic prescribing 3rd edition, 2018.                                                                                                            |
| Sergi et al, 2011                                          | Polypharmacy in the elderly: Can comprehensive geriatric assessment reduce inappropriate medication use?                                                                   |
| Sivagnanam, 2016                                           | Deprescription: The prescription metabolism                                                                                                                                |
| The Guidelines group of Hesse, 2014                        | Recommendations for treating adult and geriatric patients on multimедication                                                                                               |
| Vrdoljak & Borovac, 2015                                   | Medication in the elderly - considerations and therapy prescription guidelines                                                                                             |
| Department of Health UK, 2001                              | Medicines and older people-implementing medications-related aspects of the NSF for older people                                                                            |
| Lenaerts et al, 2013                                       | Appropriate prescribing for Older people: A new tool for General Practitioner                                                                                              |
| Drenth-van Maanen, 2017                                    | The Systematic Tool to Reduce Inappropriate Prescribing (STRIP): Combining implicit and explicit prescribing tools to improve appropriate prescribing                      |
| Basger et al, 2012 <sup>5</sup>                            | Validation of prescribing appropriateness criteria for older Australians using the RAND/UCLA appropriateness method                                                        |
| Basger et al, 2008 <sup>5</sup>                            | Inappropriate Medication Use and Prescribing Indicators in Elderly Australians: Development of a Prescribing Indicators Tool                                               |
| <b>4) Others</b>                                           |                                                                                                                                                                            |
| Muche-Borowski et al, 2017                                 | Development of a meta-algorithm for guiding primary care encounters for patients with multimorbidity using evidence-based and case-based guideline development methodology |
| Schippinger et al, 2018                                    | Optimizing medical care for geriatric patients in Austria: defining a top five list of “Choosing Wisely” recommendations using the Delphi technique                        |
| Roughead et al, 2011                                       | Multimorbidity, care complexity and prescribing for the elderly                                                                                                            |

|                          |                                                                                                                                                                                  |
|--------------------------|----------------------------------------------------------------------------------------------------------------------------------------------------------------------------------|
| Rieckert et al, 2018     | Reduction of inappropriate medication in older populations by electronic decision support (the PRIMA-eDS study): a qualitative study of practical implementation in primary care |
| Niehoff et al, 2016      | Development of the Tool to Reduce Inappropriate Medications (TRIM): A Clinical Decision Support System to Improve Medication Prescribing for Older Adults                        |
| Van Summeren et al, 2017 | Outcome prioritisation tool for medication review in older patients with multimorbidity: a pilot study in general practice                                                       |
| Vetrano et al, 2017      | An International Perspective on Chronic Multimorbidity: Approaching the Elephant in the Room                                                                                     |

<sup>1-5</sup> only counting once for each unique tool for summary under information on guidelines
